# Supplementary material
Source: HighWire-hosted journal article supplement (https://www.highwirestage.com/highwire/filestream/52199/field_highwire_adjunct_files/0/1362_table.pdf)
Supplement: 1362_table.pdf [file 1362_table.pdf]

| On-line Table 1: Patient, lesion characteristics, clinical outcome, and DSC perfusion imaging results |            |             |              |              |                 |                                 |                |          |           |          |          |                 |
|-------------------------------------------------------------------------------------------------------|------------|-------------|--------------|--------------|-----------------|---------------------------------|----------------|----------|-----------|----------|----------|-----------------|
| MRI No.                                                                                               | Lesion No. | Patient No. | Sex/Age (yr) | Primary Site | Lesion Location | Diagnosis Confirmation          | Patient Status | ROI (mL) | Mean rCBV | Mean rPH | Mean PSR | Final Diagnosis |
| 1                                                                                                     | 1          | 1           | F/49         | Breast*      | Fr              | Resection with brachy at 8.7 m  | Died 37.9 m    | 2.88     | 1.38      | 1.53     | 60.63    | R               |
| 2                                                                                                     | 2          | 2           | F/36         | Breast*      | Cb              | Resection with brachy at 8.6 m  | Alive 38.5 m   | 1.02     | 1.77      | 1.03     | 66.06    | R               |
| 3                                                                                                     | 2          | 2           | F/36         | Breast*      | Cb              | Resection with brachy at 8.6 m  | Alive 38.5 m   | 1.39     | 1.80      | 1.41     | 55.34    | R               |
| 4                                                                                                     | 3          | 3           | F/43         | Breast*      | Cb              | Resection at 21.9 m             | Died 39.4 m    | 1.98     | 2.54      | 1.17     | 48.48    | R               |
| 5                                                                                                     | 4          | 4           | F/53         | Lung*        | Fr              | Resection with brachy at 9.0 m  | Lost 14.0 m    | 1.13     | 3.29      | 1.01     | 70.06    | R               |
| 6                                                                                                     | 5          | 5           | F/54         | Lung         | FrP             | Progression lead to death       | Died 10.9 m    | 2.78     | 1.62      | 1.09     | 52.55    | R               |
| 7                                                                                                     | 5          | 5           | F/54         | Lung         | FrP             | Progression lead to death       | Died 10.9 m    | 1.23     | 3.37      | 1.69     | 53.63    | R               |
| 8                                                                                                     | 6          | 6           | F/68         | Lung*        | Fr              | Autopsy 21.7 m after 1st GK     | Died 21.7 m    | 0.76     | 2.68      | 2.66     | 57.34    | R               |
| 9                                                                                                     | 7          | 6           | F/68         | Lung*        | P               | Autopsy 7.2 m after 2nd GK      | Died 7.2 m     | 0.36     | 1.56      | 1.60     | 66.38    | R               |
| 10                                                                                                    | 8          | 7           | M/57         | Lung*        | TmO             | Resection at 4.6 m              | Died 26.8 m    | 2.32     | 1.72      | 1.94     | 64.16    | R               |
| 11                                                                                                    | 9          | 8           | M/59         | Lung         | Fr              | Progression lead to death       | Died 28.4 m    | 1.71     | 2.85      | 2.18     | 79.01    | R               |
| 12                                                                                                    | 10         | 9           | M/53         | Lung*        | Fr              | Resection at 8.7 m              | Died 11.9 m    | 9.18     | 1.52      | 1.36     | 64.38    | R               |
| 13                                                                                                    | 11         | 10          | M/54         | Lung*        | Fr              | Resection at 8.9 m              | Died 11.1 m    | 1.07     | 1.80      | 1.33     | 68.51    | R               |
| 14                                                                                                    | 12         | 11          | M/59         | Lung*        | O               | Resection at 10.1 m             | Died 22.6 m    | 7.24     | 1.55      | 1.30     | 55.28    | R               |
| 15                                                                                                    | 13         | 12          | M/68         | Lung*        | Cb              | Resection with brachy at 16.1 m | Died 33.4 m    | 2.39     | 2.61      | 0.39     | 52.17    | R               |
| 16                                                                                                    | 14         | 13          | M/69         | Lung*        | O               | Resection at 17.9 m             | Died 32.6 m    | 3.97     | 4.28      | 2.29     | 54.81    | R               |
| 17                                                                                                    | 14         | 13          | M/69         | Lung*        | O               | Resection at 24.6 m             | Died 32.6 m    | 8.52     | 4.52      | 1.82     | 35.76    | R               |
| 18                                                                                                    | 15         | 14          | F/57         | Lung*        | Tm              | Resection with brachy at 10.6 m | Died 17.3 m    | 16.4     | 1.55      | 0.80     | 59.09    | R               |
| 19                                                                                                    | 16         | 15          | F/59         | Lung*        | O               | Resection with brachy at 12.5 m | Alive 44.1 m   | 4.49     | 3.91      | 1.84     | 48.78    | R               |
| 20                                                                                                    | 17         | 16          | F/58         | Breast*      | Fr              | Resection with brachy at 7.6 m  | Died 31.3 m    | 1.22     | 1.55      | 1.81     | 75.89    | R               |
| 21                                                                                                    | 18         | 17          | F/56         | Lung*        | P               | Resection at 6.9 m              | Died 9.2 m     | 0.38     | 2.53      | 2.60     | 63.37    | R               |
| 22                                                                                                    | 19         | 18          | M/64         | Lung*        | O               | Resection at 4.2 m              | Alive 32.9 m   | 2.00     | 1.59      | 1.74     | 72.84    | R               |
| 23                                                                                                    | 20         | 19          | F/50         | Breast*      | Fr              | Resection at 52.9 m             | Alive 68.7 m   | 0.84     | 2.30      | 1.67     | 64.94    | R               |
| 24                                                                                                    | 21         | 20          | F/44         | Breast       | O               | Reduced enhancement at 19.5 m   | Alive 28.9 m   | 0.56     | 1.18      | 1.51     | 85.71    | RN              |
| 25                                                                                                    | 22         | 21          | M/72         | Sarcoma*     | O               | Resection at 2.5 m              | Died 9.9 m     | 6.06     | 0.67      | 0.24     | 81.41    | RN              |
| 26                                                                                                    | 23         | 22          | F/58         | Lung         | O               | Improved, new mets progressed   | Died 15.7 m    | 0.57     | 0.60      | 0.74     | 87.10    | RN              |
| 27                                                                                                    | 24         | 23          | F/43         | Breast       | Fr              | Stable enhancement at 9 m       | Died 11.9 m    | 2.42     | 1.53      | 1.67     | 86.54    | RN              |
| 28                                                                                                    | 25         | 24          | F/47         | Breast*      | Cb              | Resection at 12.6 m             | Alive 39.9 m   | 0.71     | 3.15      | 1.08     | 79.01    | RN              |
| 29                                                                                                    | 26         | 25          | M/60         | Kidney       | O               | Reduced enhancement at 16.5 m   | Died 47.2 m    | 0.48     | 0.97      | 0.92     | 86.67    | RN              |
| 30                                                                                                    | 27         | 17          | F/56         | Lung*        | PrO             | Resection at 6.9 m              | Died 9.2 m     | 4.33     | 3.17      | 0.63     | 86.75    | RN              |
| 31                                                                                                    | 28         | 18          | M/66         | Lung*        | Tm              | Resection at 4.3 m              | Alive 9.1 m    | 6.17     | 0.97      | 0.93     | 83.96    | RN              |
| 32                                                                                                    | 29         | 26          | F/69         | Lung         | Fr              | Reduced enhancement at 19.3 m   | Alive 32.7 m   | 0.64     | 1.49      | 0.80     | 76.67    | RN              |
| 33                                                                                                    | 29         | 26          | F/69         | Lung         | Fr              | Reduced enhancement at 19.3 m   | Alive 32.7 m   | 0.42     | 0.97      | 0.96     | 80.49    | RN              |
| 34                                                                                                    | 30         | 27          | M/56         | Kidney       | Tm              | Reduced enhancement at 11.5 m   | Alive 15.7 m   | 1.21     | 2.26      | 1.92     | 82.35    | RN              |

**Note:**—MRI indicates MR imaging; Fr, frontal; Tm, temporal; O, occipital; P, parietal; FrP, frontal-parietal; TmO, temporal-occipital; PrO, parietal-occipital; Cb, cerebellum; m, months; ROI, region of interest; R, recurrent tumor; RN, radiation necrosis; brachy, brachytherapy; GK, gamma knife; mets, metastasis; DSC, dynamic susceptibility-weighted contrast-enhanced; rCBV, relative cerebral blood volume; rPH, relative peak height; PSR, percentage of signal-intensity recovery.

\*Final diagnosis was provided histologically by surgical resection or stereotactic biopsy.
